# Supplementary material for: Experimental Infection of Pregnant Female Sheep with Zika Virus During Early Gestation
Source: MDPI journal article supplement (doi:10.3390/v11090795), 2019-08-29
Supplement: s1 [file s1]

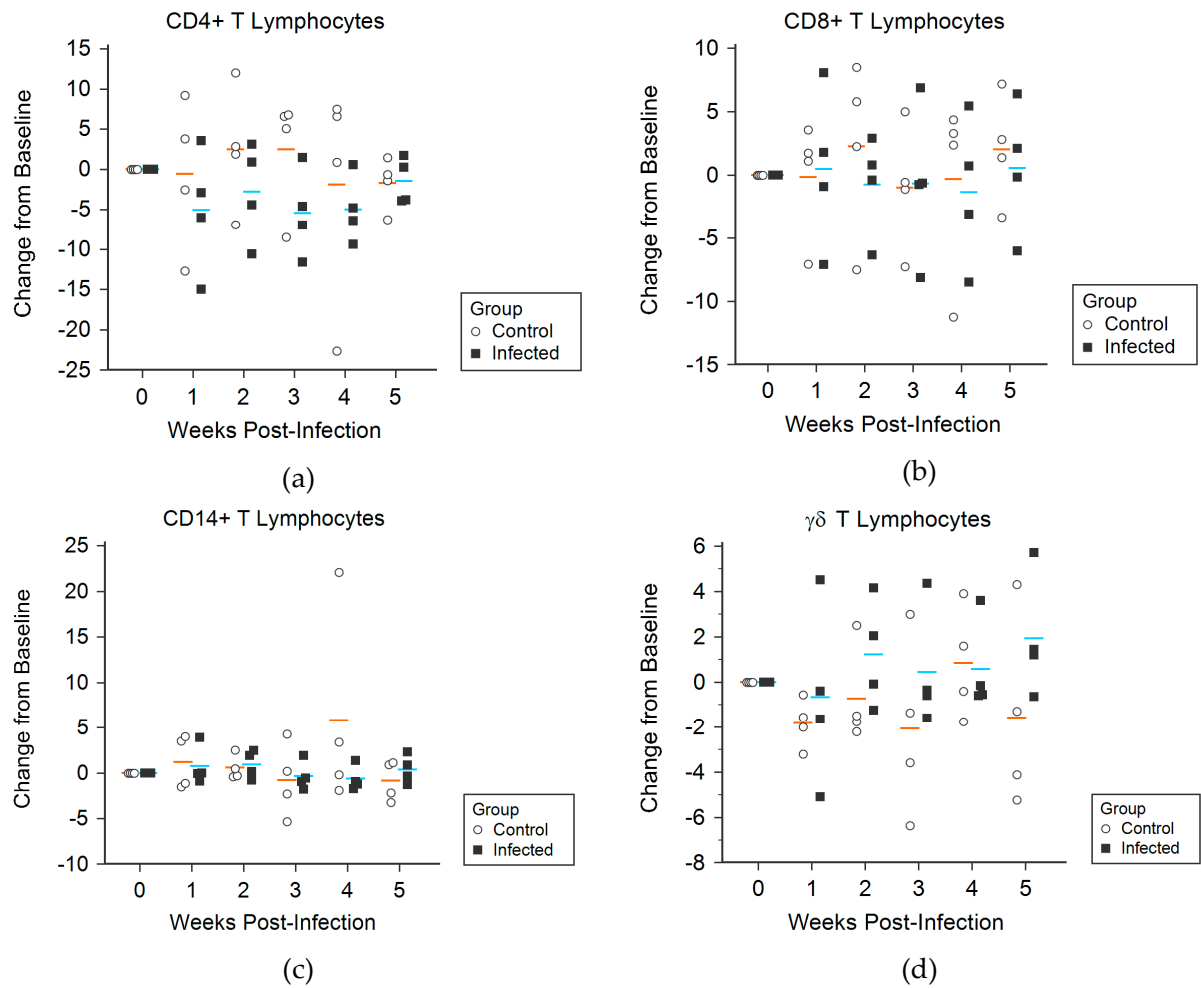

**Figure S1.** PBMC phenotypes measured by FACS over the course of the study period, reported as the change in percentage of cells from initial pre-infection measurement (standardized to 0 on the y-axis); horizontal lines indicate the mean change in percentage for each group, where blue represents infected animals and orange represents control animals. Specific phenotypes measured included: a) CD4+ T lymphocytes; b) CD8+ T lymphocytes; c) CD14+ monocytes; and d)  $\gamma\delta$  T lymphocytes.
